# Supplementary material
Source: PubMed Central journal article supplement (PMC3514908)
Supplement: NIHMS422975-supplement-Supplementary_Data.pdf [file NIHMS422975-supplement-Supplementary_Data.pdf]

Supplementary information for:

**Overexpression of the *Aspergillus nidulans* histone 4 acetyltransferase EsaA increases activation secondary metabolite production**

**Alexandra A. Soukup<sup>a</sup>, Yi-Ming Chiang<sup>b, c</sup>, Jin Woo Bok<sup>d</sup>, Yazmid Reyes-Dominguez<sup>e</sup>, Berl R. Oakley<sup>f</sup>, Clay C. C. Wang<sup>c, g</sup>, Joseph Strauss<sup>e</sup>, and Nancy P. Keller<sup>d, h, \*</sup>**

a. Department of Genetics, University of Wisconsin-Madison, 1550 Linden Drive, Madison, WI, USA 53706

b. Graduate Institute of Pharmaceutical Science, Chia Nan University of Pharmacy and Science, Tainan, Taiwan, ROC 71710

c. Department of Pharmacology and Pharmaceutical Sciences, University of Southern California, 1985 Zonal Avenue, Los Angeles, CA, USA 90033

d. Department of Bacteriology, University of Wisconsin-Madison, 1550 Linden Drive, Madison, WI, USA 53706

e. Fungal Genetics and Genomics Unit, University of Natural Resources and Life Sciences Vienna, and Austrian Institute of Technology GmbH, University and Research Center Campus Tulln, Konrad Lorenz Strasse 24, Tulln/Donau, Austria A-3430

f. Department of Molecular Biosciences, University of Kansas, 1200 Sunnyside Avenue, Lawrence, KS, USA 66045

g. Department of Chemistry, University of Southern California, 1985 Zonal Avenue, Los Angeles, CA, USA 90033

h. Department of Medical Microbiology and Immunology, University of Wisconsin-Madison, 1550 Linden Drive, Madison, WI, USA 53706

\* Corresponding author: [npkeller@wisc.edu](mailto:npkeller@wisc.edu) 3476 Microbial Sciences, 1550 Linden Drive, Madison, WI, USA 53706 Phone: (608) 262-9795 Fax: (608)262-8418

Table S1: Primers used for strain construction

| Sequence                                                           | Primer Name            | Purpose                            |
|--------------------------------------------------------------------|------------------------|------------------------------------|
| TTT <u>GCGGCCG</u> CCGCTAGACAA<br>GTCGAGGAAGCCG                    | esaA 3' flank rev NotI | <i>OE::esaA</i> construct          |
| CCATGAGAGTCTCGGACGCCCA<br>TTGTGATGTCTGCTCAAGCGGG<br>GTA            | gpdA(p) 3' esaA        | <i>OE::esaA</i> construct          |
| CCCGCTT <u>GAGCAGACAT</u> CACAA<br>TGGGCGTCCGAGACTCTCATGG<br>CGAGG | esaA 5' for            | <i>OE::esaA</i> construct          |
| AAGGCTT <u>GCGGCCG</u> CTGCGTTG<br>GT                              | gpdF NotI              | <i>OE::esaA</i> construct          |
| GGCCTGTTGTGCTCGATATTGA<br>TGCTCTGATG                               | esaA 5' flank for      | $\Delta$ <i>esaA</i> construct     |
| CAAGCTATCGATACCTCGACTC<br>TAGTCAGTAGAAAATAGAGGAT<br>AAACCAC        | esaA 5' flank rev      | $\Delta$ <i>esaA</i> construct     |
| GTGGTTTATCCTCTATTTTCTAC<br>TGACTAGAGTCGAGGTATCGAT<br>AGCTTG        | A. p. pyrG 5'          | $\Delta$ <i>esaA</i> construct     |
| TACCACTACTGAATCAACGAGA<br>GGAAAATAAGCAATTTCGACAAT<br>CGGAGAGGCTGC  | A. p. pyrG 3'          | $\Delta$ <i>esaA</i> construct     |
| GCAGCCTCTCCGATTGTCGAAT<br>TGCTTATTTTCCTCTCGTTGATT<br>CAGTAGTGGTA   | esaA 3' flank for      | $\Delta$ <i>esaA</i> construct     |
| CAGAGCGTTGAGCCTTTCTGGA<br>TTGGTTAC                                 | esaA 3' flank rev      | $\Delta$ <i>esaA</i> construct     |
| TTTGAATTCATGGGCGTCCGAG<br>ACTCTCATGGCG                             | esaA cDNA 5' EcoRI     | Yeast complementation<br>construct |
| TTTGAATTCACCAATTCATG<br>TTCGACTGGACGCAG                            | esaA 3' EcoRI          | Yeast complementation<br>construct |
| TTTGAATTCCTTGCTTCTAGCTG<br>CTTCAGACTCC                             | ESA1(p) 5' EcoRI       | Yeast complementation<br>construct |
| CCATGAGAGTCTCGGACGCCCA<br>TATGTCTGACTCCTCAGAAGCC                   | ESA1(p) 3' esaA cDNA   | Yeast complementation<br>construct |
| GAAAAATAACACGGCCCTTGA<br>GGCGATATGTCTGACTCCTCAG<br>AAGCCACTGTA     | ESA1(p) w esaA UTR 3'  | Yeast complementation<br>construct |
| TACAGTGGCTTCTGAGGAGTCA<br>GACATATCGCCTCAAGGGCCGT<br>GTTATTTTTTC    | esaA w esaA UTR 5'     | Yeast complementation<br>construct |
| GCGTCCAAATATCGTGCCTCTC<br>C                                        | gpdAp int 5'           | <i>OE::esaA</i> confirmation       |
| TCTCTGCTTTTCTTAACGCTCCA<br>TCCTACA                                 | esaA int 3'            | <i>OE::esaA</i> confirmation       |

|                                   |                |                           |
|-----------------------------------|----------------|---------------------------|
| GACTCTGCAGTGCGAGATGCGC<br>GGG     | AN10956 5' ext | <i>ΔesaA</i> confirmation |
| TATTCCATCAGCTACTGAACAA<br>CTTCTAC | pyrG 3' int    | <i>ΔesaA</i> confirmation |

Table S1. Primers used for strain construction and confirmation. Restriction enzyme sites are underlined.

Table S2: Primers used for qPCR

| Sequence                       | Primer Name |
|--------------------------------|-------------|
| GCTTGATGGTACGATGCTGCG          | acvA(p) F   |
| CTGAGGGGATATCGCTTGAG           | acvA(p) R   |
| GATATTTGCATATGATACAGGCCCGCATTG | aflR(p) F   |
| AACCCTTGAAACCCATAGCCAGTAAAG    | aflR(p) R   |
| CGACGAGTGTGGTCGGCTC            | ipnA(p) F   |
| CGGTGGTAACGGAAGGATCC           | ipnA(p) R   |
| CAGCTTCCAGCCATGATTAAG          | orsA(p) F   |
| GCACTGCTGTTCTATTGCC            | orsA(p) R   |
| GTGAGTCCAGAGTATCCCAG           | orsD(p) F   |
| AATGAGAAGAATGCCAAGCC           | orsD(p) R   |
| CCTGATGTAGGATTAGGATAGAATG      | stcO(p) F   |
| CCTGATGTAGGATTAGGATAGAATG      | stcO(p) F   |
| AAGGCTGGGCTGAAGATTATCGAG       | stcO(p) R   |
| AAGGCTGGGCTGAAGATTATCGAG       | stcO(p) R   |
| CGTCAGCGTGTAATATGAAC           | tdiA(p) F   |
| CCACGTCACCACTTTCAACTC          | actA F      |
| GACGGAGTATTTGCGCTCAG           | actA R      |
| AGTCTATTGTCTGGATTCTTCGTC       | acvA F      |
| CGTCTCGAATTCCTTTGTCC           | acvA R      |
| GACAGCACCATCACCAACAAC          | aflR F      |
| GAGTGACGATAGGTCGGTGG           | aflR R      |
| CCGACGGCACCAAACCTGAG           | ipnA F      |
| GCTCTGCATTAACCCATTTAC          | ipnA R      |
| GCTGACCTGGTACTTCTGACC          | orsA F      |
| CTATCCCATCCGCTGACGTG           | orsA R      |
| GATGTCGATTTGGAAGAGCAG          | orsD F      |
| CATCAACCATCTCTGCTGGAG          | orsD R      |
| CCACTGACATGAAGGACAAAGAA        | stcO F      |
| TTCTCTGCCATATCTGTAGTCC         | stcO R      |
| GCTCAGGGCAGCCAAGTACC           | tdiA F      |
| CCAGAAGGACAGACCAGTAC           | tdiA R      |
| GACTCTACGTGGATTACAGCC          | tdiB F      |
| GTCGCTGAGACGGCCTCC             | tdiB R      |
| CCGATGGATACTTGACCGAAG          | tubA F      |
| CACGAGCGTAGTTGTTTGAGG          | tubA R      |

Table S2. Primers used for qPCR analysis.

Figure S1: Alignment of *A. nidulans* EsaA and homologs

|                    |                                                                                    |     |
|--------------------|------------------------------------------------------------------------------------|-----|
| <i>A.n.</i> EsaA   | MGVRDSHGEEAAGTPDPVEKGIATLNTIRIGVKAMVHKDGLRKAELLSIKQRKDGLAFYVHYVDFNKRLDEWVASSRLDL   | 80  |
| <i>S.c.</i> ESA1   | -MSHDGKEEPG-----IAKKINSVDDII IKCQCWVQKNDDEERLAEILSINTRKAPPKFYVHYVNYNKRLEWITTDRLNL  | 74  |
| <i>Sch.p.</i> Mst1 | -MNSNDVDDESK-----IETKSYEAKDIVYKSKVFAFKDGEYRKAEILMIQKRTRGVVYVHYNDYNKRLEWITIDNIDL    | 74  |
| Consensus          | -MSXDXXXEXX-----IEKKIXXXXDIXIKKXXVXKDGEXRKAELLSIXRXXGXGXFYVHYVDYNKRLEWITXDRIDL     |     |
| <i>A.n.</i> EsaA   | SQVEVEWPQPEKPEKKS GPAKAPSKNKRVRAGSRDVSATPDTLTGKNTNVGKAQRPSKAGGKENRGDET PADLSMLASEA | 160 |
| <i>S.c.</i> ESA1   | DKEVLYP---KL-KATDEDNKK---QKKKKATN-----TSETPQDSLQDGVDFGSREN-----TDV                 | 123 |
| <i>Sch.p.</i> Mst1 | SKGIEYPPPEKP-KKAHGKGS---SKRPKAVDRRRSITAPSKTEPSTPSTEKPEPSTPSGESDHG-----SNA          | 139 |
| Consensus          | SKEVEYXPPEKP-KKXXGXKX---XKRKXAXRXXSXTXXXTXXXTXSXXSXXGXG-----SXA                    |     |
| <i>A.n.</i> EsaA   | VSADGTPKAVSEIDIMMDASFTDAKEIKEEERALGLMSREEEIEKLRTSGSMTQNPTVEHVRVRLDRLQMGKYDIEPWYF   | 240 |
| <i>S.c.</i> ESA1   | MDLDN-----LNVQGIKDEN----ISHEDIKKLRTSGSMTQNPEHVARVRLNRIIMGKYEIEPWYF                 | 182 |
| <i>Sch.p.</i> Mst1 | GNESLP-----LLEEDHKPES----LSKEQEVERLRFSGSMVQNPHEIARI RNINKICIGDHEIEPWYF             | 199 |
| Consensus          | XXXDX-----LXXXXIKXEX-----XSXEXEIEKLRTSGSMTQNPEHVARVRLNRI XMGYEIEPWYF               |     |
| <i>A.n.</i> EsaA   | SPYPASFSDAEVVYIDEFCLSYFDNKRAFERHRTKCTLTHPPGNEIYRDDNISFFFEVDGRRQRTWCRNLCLLSKFLDHK   | 320 |
| <i>S.c.</i> ESA1   | SPYPIELTDEDFTYIDDFTLQYFGSKKQYERYRKKCTLRHPPGNEIYRDDYVFFFEIDGRKQRTWCRNLCLLSKFLDHK    | 262 |
| <i>Sch.p.</i> Mst1 | SPYPKEFSEVDIVYICSFYCYGSEYRQQRHREKCTLQHPGNEIYRDDYISFFFEIDGRKQRTWCRNLCLLSKFLDHK      | 279 |
| Consensus          | SPYPXEFSDXDXVYIDXFCLXYFGSKRQFERHRXKCTLXHPGNEIYRDDYISFFFEIDGRKQRTWCRNLCLLSKFLDHK    |     |
| <i>A.n.</i> EsaA   | TLYYDVPDFLFYCMCTRDETGCHLVGYFSKEKESGEGYNLACILTLTPQYQRRGYGRLLISFSYELSKREGKVGSPPEKPLS | 400 |
| <i>S.c.</i> ESA1   | TLYYDVPDFLFYCMTRRDELGHHLVGYFSKEKESADGYNVACILTLTPQYQRMGYGKLLIEFSYELSKKENKVGSPPEKPLS | 342 |
| <i>Sch.p.</i> Mst1 | MLYYDVPDFLFYCMCRREYEGCHLVGYFSKEKESSENYNLACILTLTPQYQRHGYGKLLIQFSYELTKREHKGSPPEKPLS  | 359 |
| Consensus          | TLYYDVPDFLFYCMCRREXGCHLVGYFSKEKESXEGYNLACILTLTPQYQRXGYGKLLIXFSYELSKREXKVGSPPEKPLS  |     |
| <i>A.n.</i> EsaA   | DLGLLGYRQYWRETLVEILLDSGRETVSENELAMLTSMTEKDVHETLVTFKMLRYNKGQWIIIVLTDEVIEERNKRLKEEK  | 480 |
| <i>S.c.</i> ESA1   | DLGLLSYRAYWSDTLITLLVEHQKEITID-EISSMTSMTTDDILHTAKTLNLRLRYKQGHIIIFLNED-ILDRYNRLKAKK  | 420 |
| <i>Sch.p.</i> Mst1 | DLGLISYRAYWAEQIINLVLMRTETTID-ELANKTSMTTNDVLHTLQALNMLKYKGFIIICISDG-IEQQYERLKNKK     | 437 |
| Consensus          | DLGLLSYRAYWETLIXLXXXLXXXETTID-ELAXXTSMTTXDVLHTLXTLNLMLRYKQGXIIIXLXDX-IEXYRXLKXXX   |     |
| <i>A.n.</i> EsaA   | IKGSRKIDPARLQ-WKPPVFTASSRTWNW                                                      | 508 |
| <i>S.c.</i> ESA1   | R---RTIDPNRLI-WKPPVFTASQLRFAW                                                      | 445 |
| <i>Sch.p.</i> Mst1 | R---RRRINGDLLADWQPPVFHPSQLRFGW                                                     | 463 |
| Consensus          | R---RXIDPXRLX-WKPPVFTASQLRFXW                                                      |     |

Figure S1. Alignment of *A. nidulans* EsaA with previously characterized fungal orthologs. EsaA has 65% protein identity with *Saccharomyces cerevisiae* ESA1 and 53% identity with *Schizosaccharomyces pombe* Mst1. *A.n.* *Aspergillus nidulans*, *S.c.* *Saccharomyces cerevisiae*, *Sch.p.* *Schizosaccharomyces pombe*.

Figure S2: Confirmation of *OE::esaA* strain

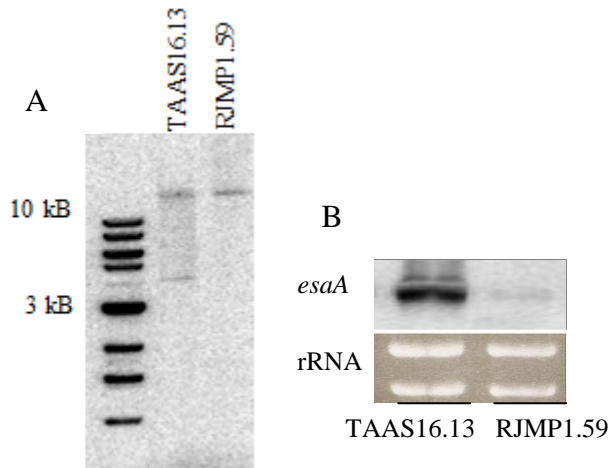

Figure S2. A. Southern blots confirming targeted integration of the *OE::esaA* construct to the *pyroA* locus. A *NotI* digest drops out the *gpdA(p)::esaA* at approximately 4 kB. As this construct is targeted to the *pyroA* locus, the native *esaA* copy is also still apparent as a large band around 93 kB. B. Northern blot confirms greatly increased expression of the *esaA* gene.

Figure S3: Confirmation of *esaA* deletion

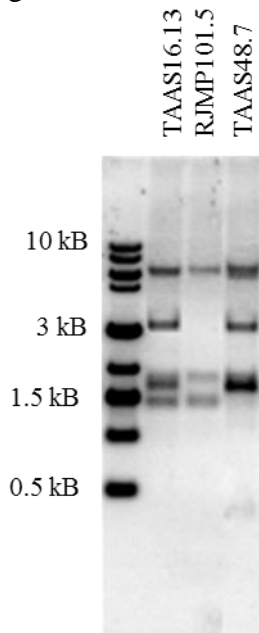

Figure S3. A. Southern blot confirming deletion of the native *esaA* allele in an *OE::esaA* background. *ClaI* digest was used to distinguish between native and ectopic copies of *esaA*. Expected sizes: WT (RJMP101.19) – 6395 bp, 1852 bp, 1458 bp; *OE::esaA* (TAAS16.13) – 3121 bp, 1695 bp; *OE::esaA ΔesaA* (TAAS48.7) – 6213 bp, 3121 bp, 1852 bp, 1695 bp, 411 bp.

Figure S4: Additional *OE::esaA* phenotypes

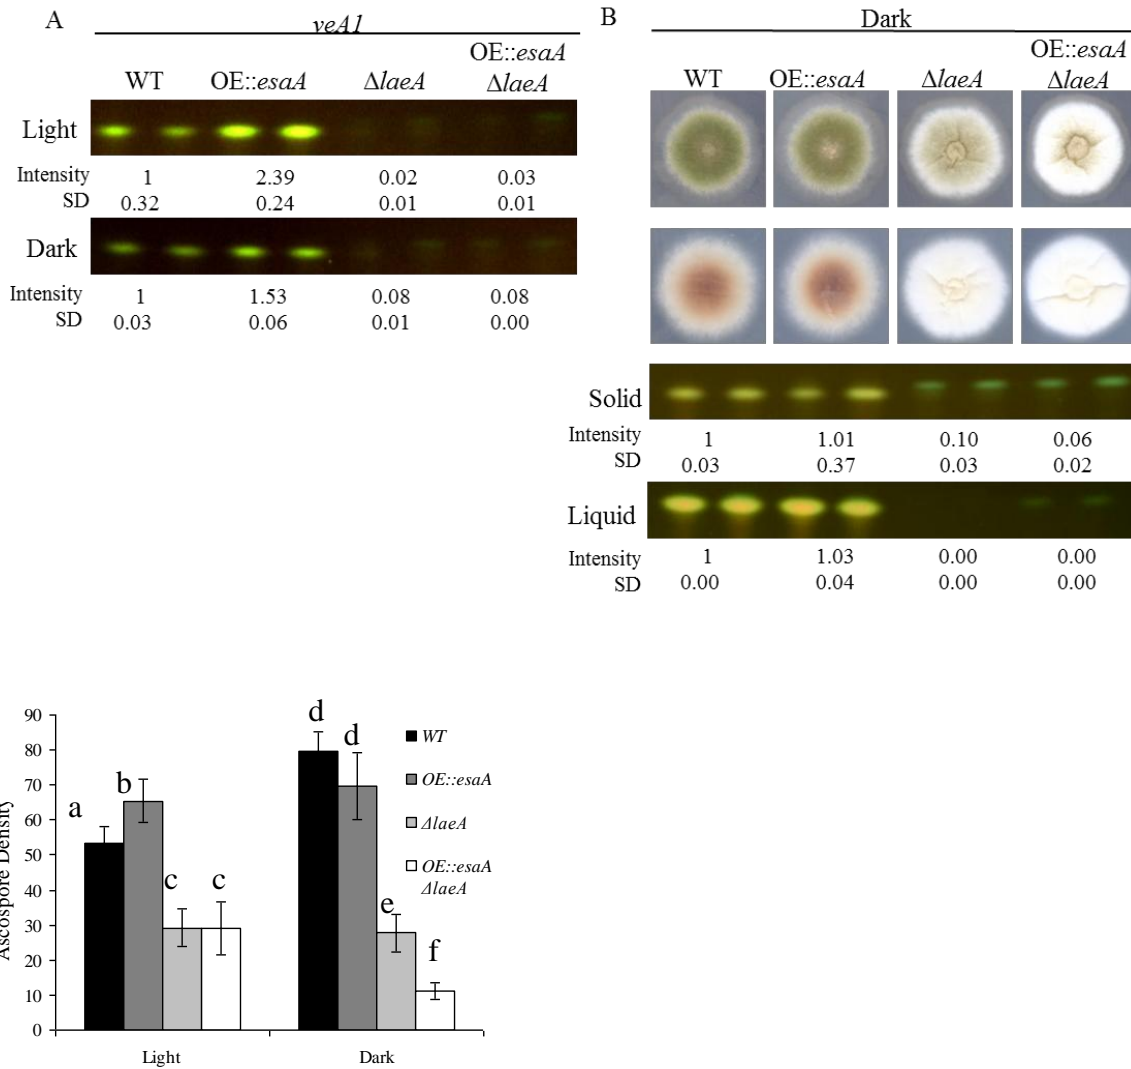

Figure S4. A. TLC of extracts from cultures from solid GMM after 3 days under light and dark conditions in a *veA1* background. *OE::esaA* increased ST regardless of illumination, but is unable to restore *ΔlaeA* defects. WT – RDIT2.3; *OE::esaA* – RAAS22.135; *ΔlaeA* – RJW46.4; *OE::esaA* *ΔlaeA* – RAAS22.100. Shown is the band corresponding to sterigmatocystin (ST). B. Under dark conditions, where SM production and sexual development are favored, *OE::esaA* does not significantly increase ST production. C. Sexual spore counts after 84 hours incubation. The *OE::esaA* strain has a mild increase in the number of sexual spores at early timepoints in the light. Incubation for longer period or in the dark abrogates this increase. Statistical analysis was performed on four replicate cultures using JMP9 Software (Version 9) to analyze data according to the Tukey-Kramer multiple comparison test with a P value < 0.05.

Figure S5: Schematic of SM clusters

ST: 56 kB

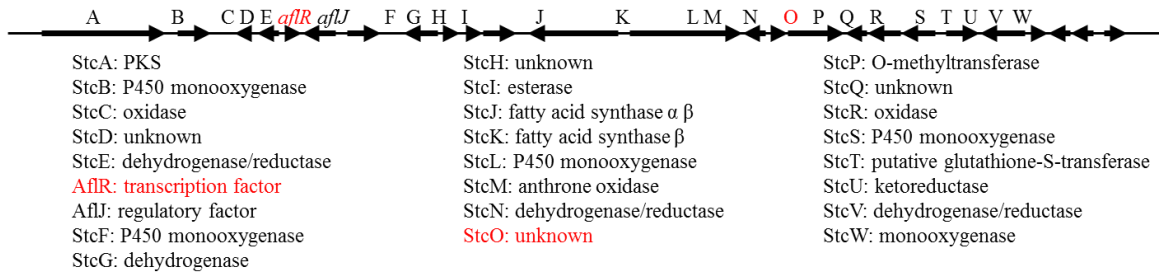

TQ: 11 kB

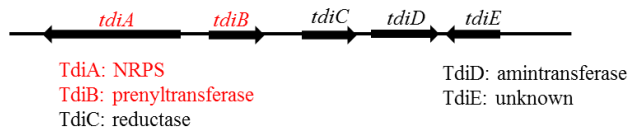

PN: 16 kB

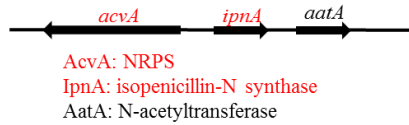

ORS: 15 kB

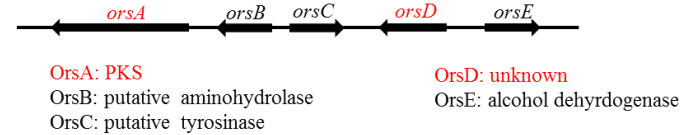

Figure S5. Schematic representation of the gene clusters examined in this study. Gene products and approximate cluster sizes are provided. Genes examined with qRT-PCR and ChIP are depicted in red.

Figure S6: *OE::esaA* is unable to suppress telomere position effect growth defects

A

B

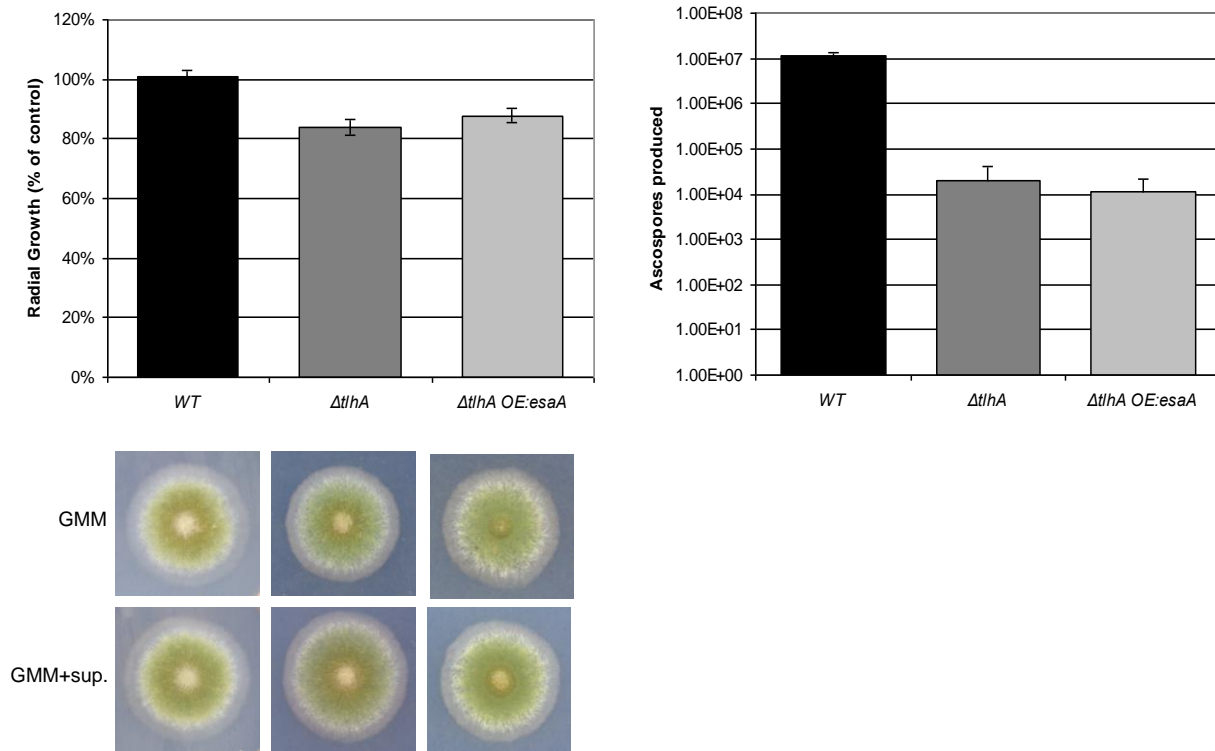

Figure S6. Introduction of *OE::esaA* is unable to restore normal growth production to a telomere position effect mutant,  $\Delta tlhA::pyrG$ . Improper expression of the *pyrG* impairs growth of the  $\Delta tlhA$  mutant, which can be remediated by supplementing the medium with the appropriate pyrimidines. Radial growth of the *OE::esaA*  $\Delta tlhA$  strain is identical to that of the  $\Delta tlhA$  single mutant, indicating no restoration of the expression of the auxotrophic marker used for the disruption. B. Ascospore production is also not restored in the double mutant. Strains used are WT – RJMP103.5,  $\Delta tlhA$  – RJMP116.3, *OE::esaA*  $\Delta tlhA$  – RAAS141.4. Supplement is 5 mM uracil and 5 mM uridine.
